# Supplementary material for: Rapid assessment of the stability of DNA duplexes by impedimetric real-time monitoring of chemically induced denaturation
Source: Royal Society of Chemistry journal article supplement (doi:10.1039/c1lc20027e), 2011-01-01
Supplement: c1lc20027e.pdf [file c1lc20027e.pdf]

Cite this: DOI: 10.1039/c0xx00000x

www.rsc.org/xxxxxx

## SUPPORTING MATERIAL

## Rapid assessment of the stability of DNA duplexes by impedimetric real-time monitoring of chemically induced denaturation

B. van Grinsven<sup>a</sup>, N. Vandenberg<sup>b</sup>, L. Grieten<sup>a</sup>, M. Murib<sup>a</sup>, S.D. Janssens<sup>a</sup>, K. Haenen<sup>a,c</sup>,  
E. Schneider<sup>d</sup>, S. Ingebrandt<sup>d</sup>, M.J. Schöning<sup>e</sup>, V. Vermeeren<sup>b</sup>, M. Ameloot<sup>b</sup>,  
L. Michiels<sup>b</sup>, R. Thoelen<sup>a,f</sup>, W. De Ceuninck<sup>a,c</sup>, and P. Wagner<sup>a,c</sup>

Received (in XXX, XXX) Xth XXXXXXXXXX 20XX, Accepted Xth XXXXXXXXXX 20XX

DOI: 10.1039/b000000x

## Supporting information

## Nyquist plots of the impedance spectra

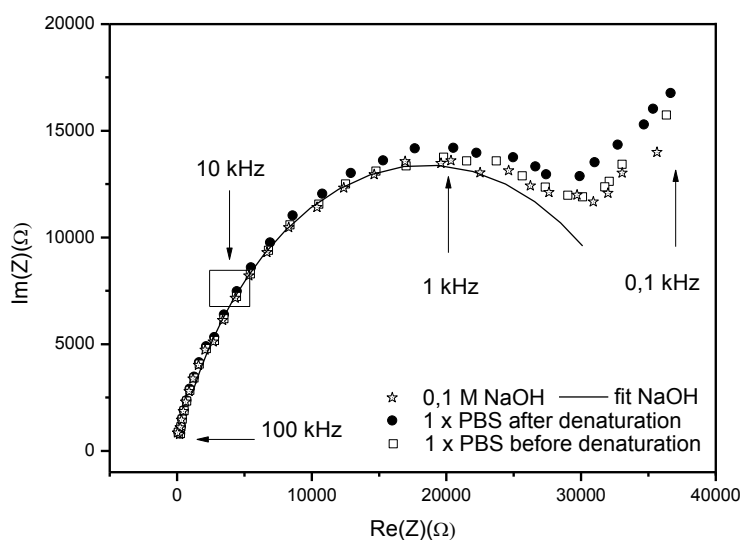

10

This Nyquist plot shows the impedance data of # D1, see Figure 2, in the full frequency range from 100 Hz to 100 kHz before denaturation (sensor cell filled with 1 × PBS), after denaturation (cell filled with 0.1 M NaOH), and after refilling with 1 × PBS. The 10 kHz point, the frequency used to extract the denaturation dynamics, is indicated by an open box. The high frequency part of all plots can be simulated with a three-element circuit consisting of a solution resistance  $R_1$  in series with a complex resistance describing the biological and the topmost DNA layer. This layer can be represented by a resistor  $R_2$  and a constant-phase element CPE with an almost capacitive behaviour ( $n = 0.80$ ). The Nyquist plot indicates that there is a second semi circle in the low-frequency domain, but the data, not extending below 100 Hz, do not allow for a reliable fitting. A complete scheme, taking into account also the space-charge region to model the second semi circle, is supposed to correspond to the circuit below.

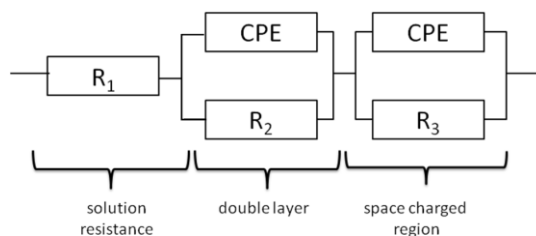

The fit parameters obtained for the three elements  $R_1$ , CPE and  $n$ , and  $R_2$  are summarized in the following table. Only data points in the frequency range between 1 kHz and 100 kHz were taken into account. Although there is no marked difference for the situation in 1 × PBS buffer before and after denaturation, we suppose that the sensor effect is mainly related to the capacitive constant-phase properties of the electrode surface.

5

|                     | 1 x PBS before denaturation | 1 x PBS after denaturation | 0.1 M NaOH | Error (%) |
|---------------------|-----------------------------|----------------------------|------------|-----------|
| $R_1$ ( $\Omega$ )  | 142                         | 142                        | 140        | 2.5       |
| CPE ( $nSs^n$ )     | 21.9                        | 24.1                       | 23.9       | 2.2       |
| $n$                 | 0.8                         | 0.79                       | 0.79       | 1.0       |
| $R_2$ ( $k\Omega$ ) | 39.3                        | 38.0                       | 37.1       | 1.2       |

### Chemical agents and buffer solutions

The probe ssDNA molecules were purchased from Eurogentec (Seraing, Belgium), and were modified at the 5' end with a  $NH_2$ -modifier (36 bp: 5'- $NH_2$ - $C_6H_{12}$ -AAA-AAA-ACC-CCT-GCA-GCC-CAT-GTA-TAC-CCC-CGA-ACC-3'). The target ssDNA molecules bought from Invitrogen (Merelbeke, Belgium), were modified at the 5'-end with an Alexa Fluor® 488 label. Target ssDNA contains a sequence that is either completely complementary to the probe ssDNA (29 bp : 5'-Alexa 488-  $C_6H_{12}$ -GGT-TCG-GGG-GTA-TAC-ATG-GGC-TGC-AGG-GG-3'), carries a 1-base mismatch to the probe ssDNA on to distinct locations (29 bp: 5'-Alexa 488-  $C_6H_{12}$ -GGT-TCG-GGG-GTA-TAC-ATG-GGC-TCC-AGG-GG-3' and 29 bp: 5' -Alexa 488- $C_6H_{12}$ -GGT-TCG-GGG-CTA-TAC-ATG-GGC-TGC-AGG-GG-3'), or complementary random (29 bp: 5'-Alexa 488-  $C_6H_{12}$ -TCA-AAT-TGC-CAG-AAC-AAC-TAC-TGA-CTG-AA-3'). Sodium dodecyl sulfate (SDS) was obtained from VWR International (Zaventem, Belgium). 10-Undecenoic acid (UDA) was bought from Sigma-Aldrich (Bornem, Belgium). EDC and 2-[N-morpholino]-ethanesulphonicacid (MES) were purchased from Perbio Science (Erembodegem, Belgium). Sodiumhydroxide (NaOH) was acquired from Merck (Overijse, Belgium). Phosphate buffered saline (PBS) (1.29 M NaCl, 0.05 M  $Na_2HPO_4 \cdot 2H_2O$ , 0.015 M  $KH_2PO_4$ , pH 7.2) sodium chloride/ sodium citrate (SSC) buffer (3 M NaCl, 0.3 M  $C_6H_8O_7 \cdot 3Na$ , pH7.5) and hybridization buffer (0.75 M NaCl, 0.075 M  $C_6H_8O_7 \cdot 3Na$ , 0.1% BSA, 0.1% Ficoll, 0.1%  $C_6H_9NO$ , 5% dextran sulphate, 5 mM  $Na_2HPO_4$ , 0,1% SDS, 50 $\mu$ g/L herring sperm DNA) were homemade.

15  
20
